# Supplementary material for: Overexpression of the OsIMP Gene Increases the Accumulation of Inositol and Confers Enhanced Cold Tolerance in Tobacco through Modulation of the Antioxidant Enzymes’ Activities
Source: PubMed Central journal article supplement (PMC5541312; doi:10.3390/genes8070179), 2017-07-20
Supplement: genes-08-00179-s001.pdf [file genes-08-00179-s001.pdf]

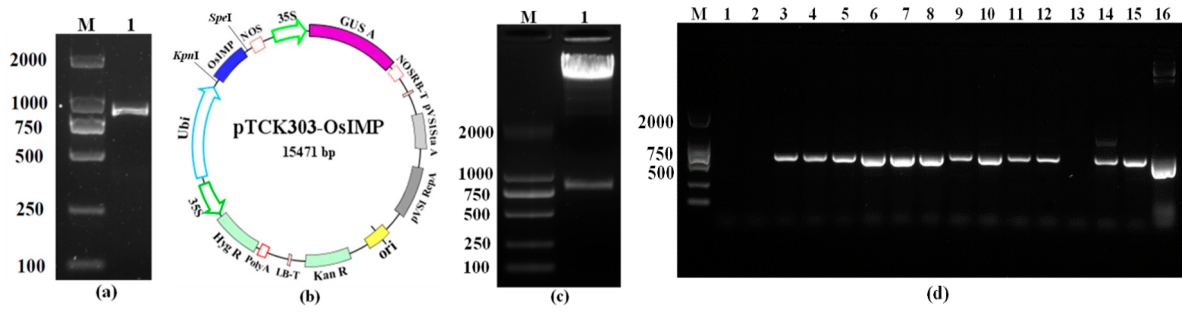

**Figure S1.** Analysis of *OsIMP*: (a) M: DL2000 marker (Takara), 1: PCR product of *OsIMP* gene; (b) Construct of pTCK303–*OsIMP* vector; (c) Restriction analysis of pTCK303–*OsIMP* vector, M: DL2000 marker (Takara), 1: pTCK303–*OsIMP* vector (Restricted with restriction enzymes *Kpn* I and *Spe* I); (d) PCR validation of transgenic tobacco plants, M: DL2000 marker (Takara), 1–15: putative  $T_0$  transgenic tobacco plants, 16: positive control.

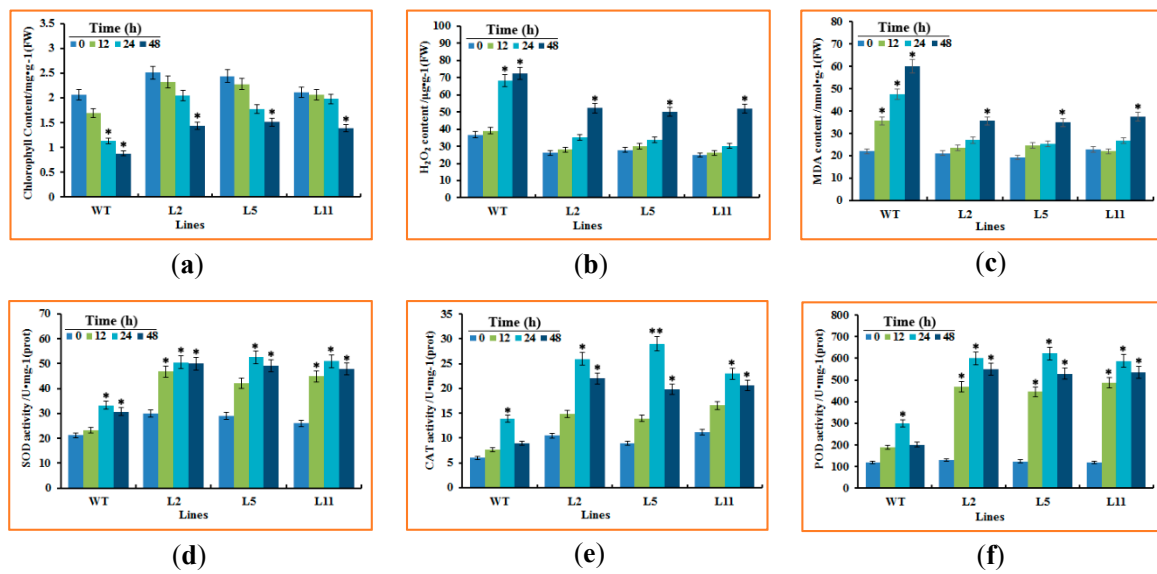

**Figure S2.** Analysis of biochemical parameters in same plant lines under cold stress at different time points. (a) chlorophyll, (b)  $H_2O_2$ , (c) MDA, (d) SOD, (e) CAT and (f) POD, WT: Wild type; L2, L5 and L11: transgenic lines. Data are the mean  $\pm$  SE of three biological replicates, while asterisks indicate significant difference (\*  $p < 0.05$ , \*\*  $p < 0.01$ ) in comparison with 0 h time point.

**Table S1.** Oligonucleotide primers (restriction sites are shown underlined).

| Primer Name | Genbank Accession | Sequence (5'–3')                       |
|-------------|-------------------|----------------------------------------|
| OsIMP-F     |                   | cgg <u>GGTACCAT</u> GGCGGAGGAGCAGTTC   |
| OsIMP-R     | NM_001057109.1    | gg <u>ACTAGTACTT</u> GTATCTCCCAATTC    |
| OsIMPQ-F    |                   | TGCCTTCCTCAATGGTTCTC                   |
| OsIMPQ-R    |                   | GTATCATCCAGAGTGGCCTTATC                |
| Actin-F     | XM_015774830      | CAGCACATTCCAGCAGAT                     |
| Actin-R     |                   | GGCTTAGCATTCTTGGGT                     |
| UBQ5-F      | AK061988          | GCCTCACCTACGTCTACAAC                   |
| UBQ5-R      |                   | CGATTTCCTCCTCCTTCCTTAC                 |
| OsIMPP-F    | Os03g0587000      | gc <u>GTCGAC</u> AGTGCTGACTAGTGACGAT   |
| OsIMPP-R    |                   | cg <u>GAATTC</u> CGGAATTCACTCCCAATCTAT |
| HYG-F       |                   | AGATGTTGGCGACCTCGTATTGGG               |
| HYG-R       |                   | GAGGGCGAAGAATCTCGTGCTTTC               |
